# Supplementary material for: Identification of Volatile Organic Compounds Emitted by Two Beneficial Endophytic Pseudomonas Strains from Olive Roots
Source: MDPI journal article supplement (doi:10.3390/plants11030318), 2022-01-25
Supplement: s1 [file s1]

## Supplementary material

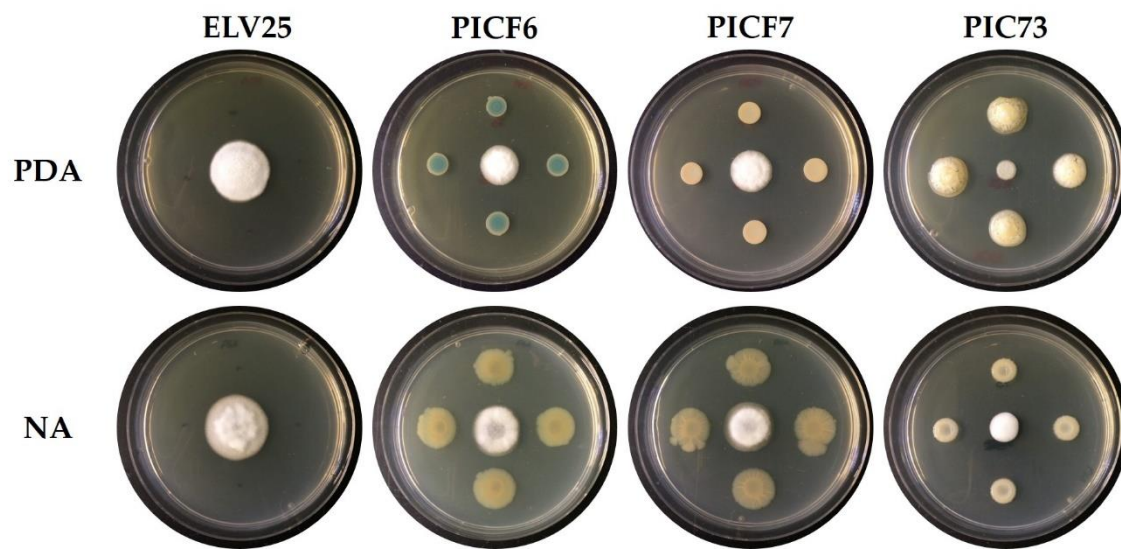

**Figure S1.** *In vitro* antagonistic activity of *Pseudomonas* sp. PICF6 and *Pseudomonas simiae* PICF7 against *Verticillium longisporum* ELV25. *Paenibacillus polymyxa* PIC73 was included in the assays as reference due to its known broad-spectrum antagonistic activity against different plant pathogens. Pictures were taken after 14 days of incubation at 25 °C. ELV25, *V. longisporum* ELV25; PICF6, *Pseudomonas* sp. PICF6; PICF7, *P. simiae* PICF7; PIC73, *P. polymyxa* PIC73; PDA, Potato Dextrose Agar; and NA, Nutrient Agar. Images correspond to representative plates from two independent experiments.

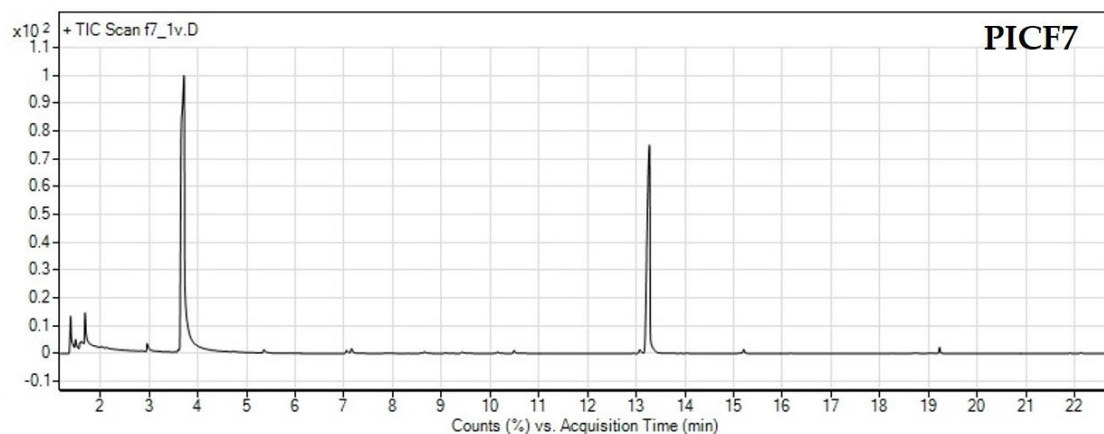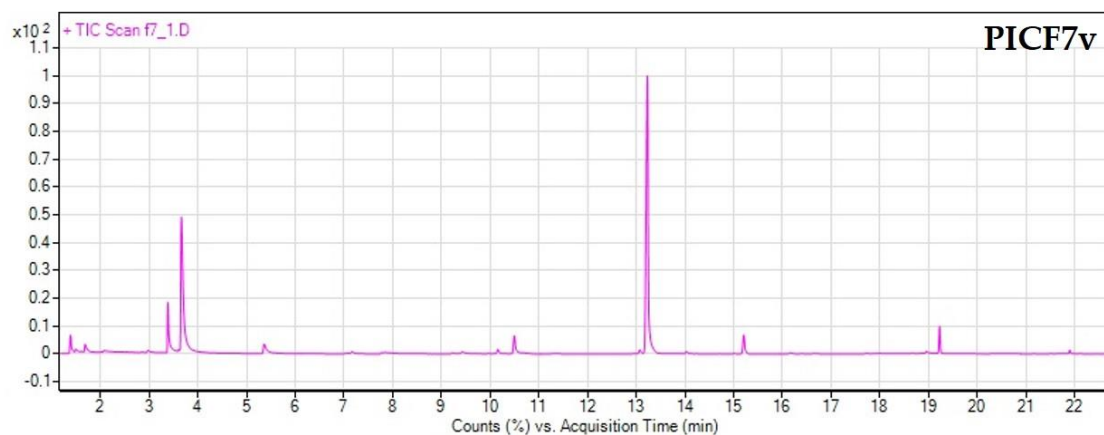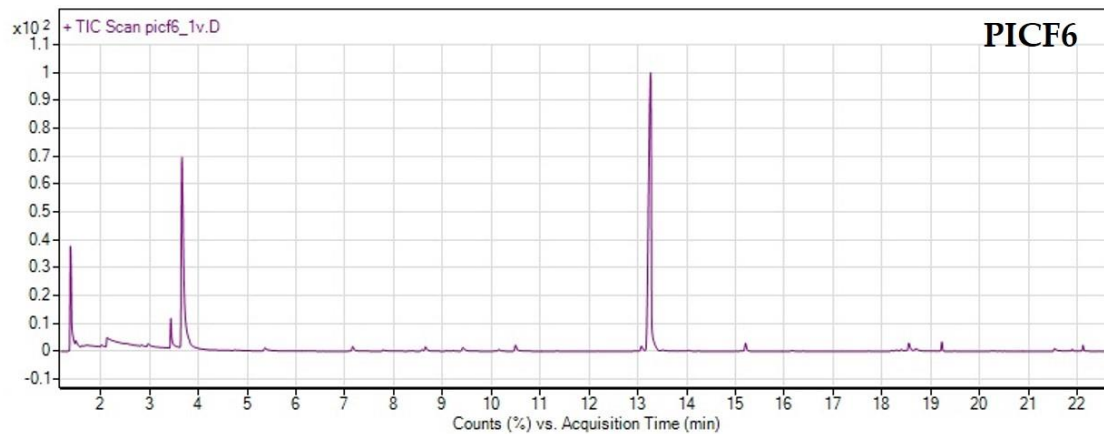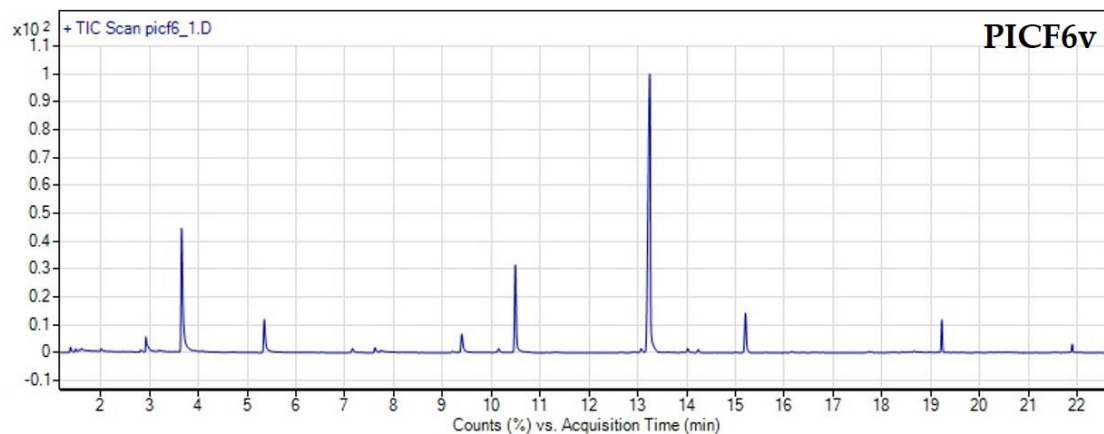

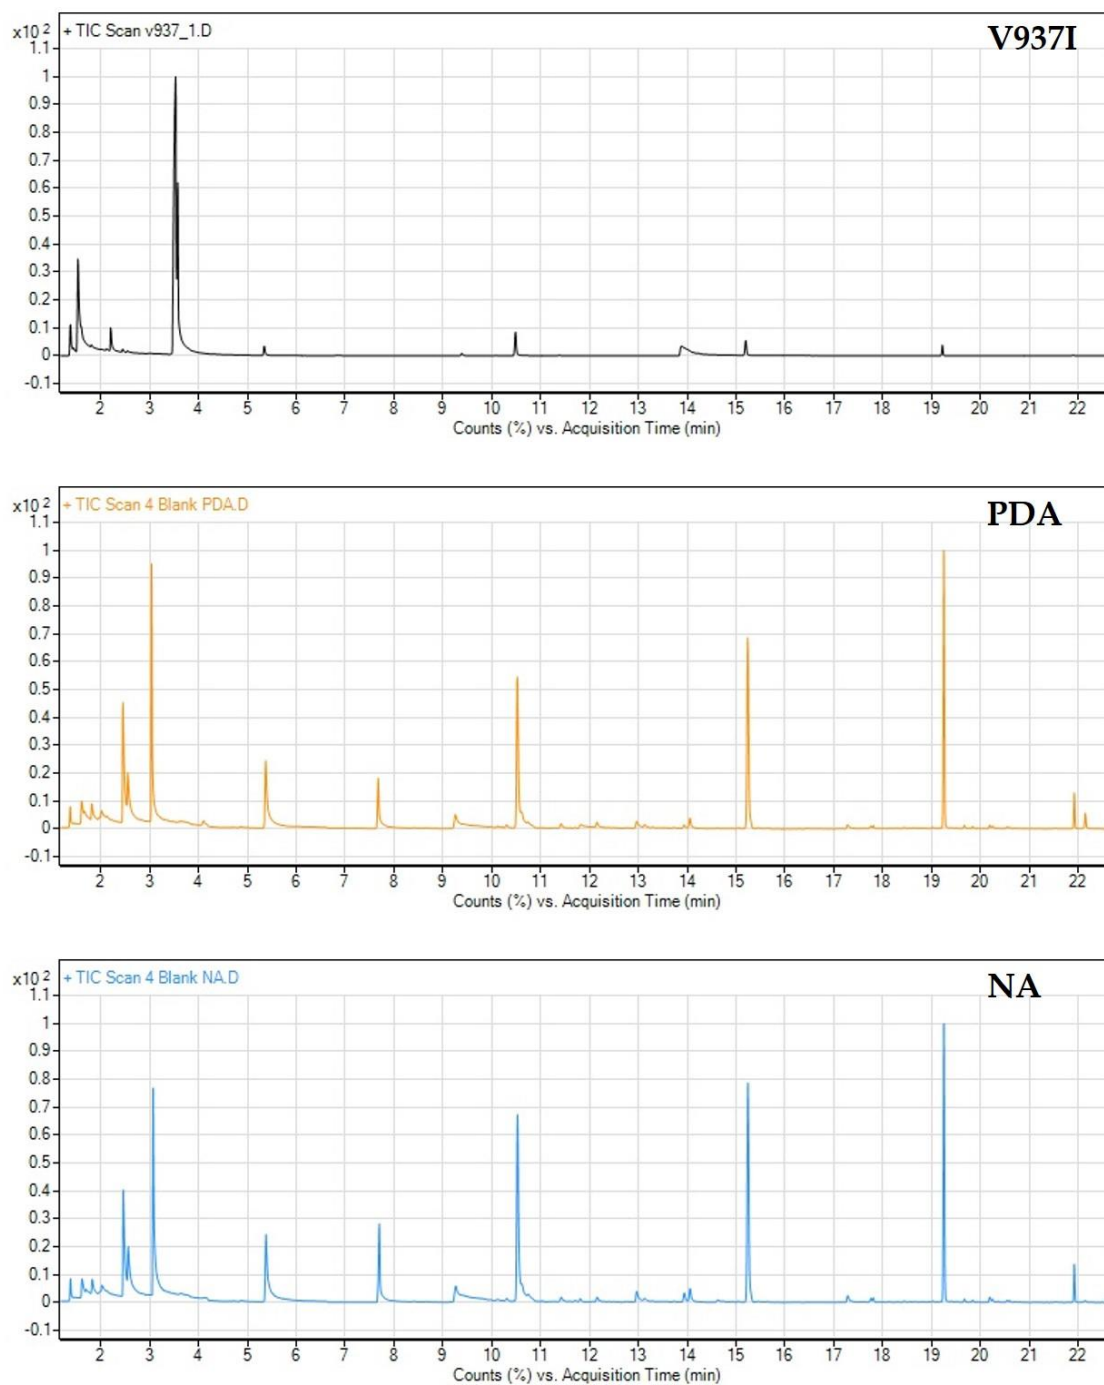

**Figure S2.** Representative gas chromatography spectra of *Pseudomonas* sp. PICF6 and *Pseudomonas simiae* PICF7 (alone and in the presence of *Verticillium dahliae* V937I), *V. dahliae* 937I, PDA and NA media. PICF6, *Pseudomonas* sp. PICF6; PICF6v, *Pseudomonas* sp. PICF6 in the presence of *V. dahliae* V937I; PICF7, *P. simiae* PICF7; PICF7v, *P. simiae* PICF7 in the presence of *V. dahliae* V937I; V937I, *V. dahliae* V937I; PDA, Potato Dextrose Agar; NA, Nutrient Agar.
